# Supplementary material for: Genotype and Maturity Stage Affect the Content and Composition of Polyamines in Tomato—Possible Relations to Plant and Human Health
Source: MDPI journal article supplement (doi:10.3390/horticulturae7090300), 2021-09-09
Supplement: s1 [file s1]

## Supplementary Materials

**Table S1.** Mass Calculation for Putrescine, Spermidine and Spermine bound with Dansyl Chloride. Each nitrogen on the chemical structure were replaced with one Mass of Dansyl Chloride.

| Study Compound  | Molecular Mass | Addition of 2 MMass of Dansyl chloride | Addition of 3 MMass of Dansyl chloride | Addition of 4 MMass of Dansyl chloride |
|-----------------|----------------|----------------------------------------|----------------------------------------|----------------------------------------|
| Putrescine      | 88.15          | 556.6                                  |                                        |                                        |
| Spermidine      | 145.2          |                                        | 846.9                                  |                                        |
| Spermine        | 202.2          |                                        |                                        | 1138.3                                 |
| Dansyl chloride | 269.74         |                                        |                                        |                                        |

**Table S2.** Mean Square Value from Analysis of Variance (ANOVA) of Polyamines Contents<sup>+</sup> and Quality Traits<sup>++</sup> in Tomato Samples as Affected by Genotype and Maturity Stage.

| Source                    | DF <sup>a</sup> | Tpa <sup>b</sup><br>(10 <sup>5</sup> ) | DF  | Put <sup>c</sup><br>(10 <sup>4</sup> ) | DF  | Spd <sup>d</sup><br>(10 <sup>4</sup> ) | DF  | Spm <sup>e</sup><br>(10 <sup>2</sup> ) | DF  | Aa <sup>f</sup><br>(10 <sup>1</sup> ) |
|---------------------------|-----------------|----------------------------------------|-----|----------------------------------------|-----|----------------------------------------|-----|----------------------------------------|-----|---------------------------------------|
| Genotype                  | 7               | 97.8***                                | 7   | 439.9***                               | 7   | 161.4***                               | 7   | 70.7***                                | 7   | 1.3                                   |
| Maturity Stage            | 5               | 1.6                                    | 5   | 83.9***                                | 5   | 54.5***                                | 5   | 252.3***                               | 5   | 29.6***                               |
| Genotype x Maturity Stage | 35              | 15.7***                                | 35  | 76.2***                                | 35  | 22.2***                                | 32  | 20.7***                                | 35  | 1.8                                   |
| Residuals                 | 125             | 1.6                                    | 125 | 7.3                                    | 125 | 3.0                                    | 101 | 4.1                                    | 134 | 1.9                                   |
|                           | DF              | Firmness                               | DF  | Ta <sup>g</sup><br>(10 <sup>-2</sup> ) | DF  | pH<br>(10 <sup>-2</sup> )              | DF  | Tss <sup>h</sup>                       | DF  | Tss:Ta <sup>i</sup>                   |
| Genotype                  | 7               | 4.3***                                 | 7   | 3.0***                                 | 7   | 9.0***                                 | 7   | 2.1***                                 | 7   | 46.6***                               |
| Maturity Stage            | 5               | 162.7***                               | 5   | 4.0***                                 | 5   | 52.0***                                | 5   | 4.3***                                 | 5   | 17.8***                               |
| Genotype x Maturity Stage | 35              | 1.4**                                  | 35  | 1.0***                                 | 35  | 3.0**                                  | 35  | 0.4***                                 | 35  | 8.8***                                |
| Residuals                 | 125             | 0.6                                    | 143 | 0.3                                    | 140 | 1.5                                    | 142 | 0.2                                    | 135 | 2.9                                   |
|                           | DF              | a* value<br>(10 <sup>1</sup> )         | DF  | b* value<br>(10 <sup>1</sup> )         | DF  | L*value<br>(10 <sup>1</sup> )          | DF  | Chroma<br>(10 <sup>1</sup> )           | DF  | Weight<br>(10 <sup>2</sup> )          |
| Genotype                  | 7               | 7.15***                                | 7   | 5.0**                                  | 7   | 7.6***                                 | 7   | 3.6***                                 | 7   | 115.3***                              |
| Maturity Stage            | 5               | 767.6***                               | 5   | 195.6***                               | 5   | 89.6***                                | 5   | 247.6***                               | 5   | 89.4***                               |
| Genotype x Maturity Stage | 35              | 2.9***                                 | 35  | 4.1***                                 | 35  | 3.9***                                 | 35  | 1.9***                                 | 35  | 5.9***                                |
| Residuals                 | 136             | 1.1                                    | 141 | 1.4                                    | 141 | 1.0                                    | 139 | 0.4                                    | 131 | 1.6                                   |

<sup>a</sup>DF=degrees of freedom, <sup>b</sup>Tpa=Total polyamines <sup>c</sup>Put=Putrescine <sup>d</sup>Spd=spermidine <sup>e</sup>Spm=spermine <sup>f</sup>Ascorbic acid, <sup>g</sup>Titrateable acidity, <sup>h</sup>Total soluble sugars. <sup>i</sup>Total soluble sugars and titrateable acidity radio. \*, \*\*, \*\*\* significant at p<0.05, 0.01, 0.001, respectively.

<sup>+</sup>Polyamines contents refers to a polyamine profile for each genotype. <sup>++</sup>Quality traits refers to Ascorbic Acid (Aa), Firmness (Fir), Titrateable acidity (Ta), pH, Total soluble sugars (Tss), Total soluble sugars and titrateable acidity radio Tss:Ta, weight a\* value, b\* value. L values and Chroma.

**Table S3.** Mean values (µg/g DW) of Polyamines in Tomato at Different Maturity Stages from Various Studies.

| Poliamine  | Maturity stage<br>(Aprox. Time) | Present study | Yahia et al [36] | Nambeesan et al<br>[72] <sup>a</sup> | Nishibori et al [76] <sup>b</sup> | Anwar et al<br>[74] <sup>c</sup> | Goyal et al<br>[75] <sup>d</sup> | Moret et al<br>[77] <sup>e</sup> |
|------------|---------------------------------|---------------|------------------|--------------------------------------|-----------------------------------|----------------------------------|----------------------------------|----------------------------------|
| Putrescine | 20 d                            | 306.7         | 0 to 100         | 0 to 33.4                            | No data                           | 0 to 26.4                        | No data                          | No data                          |
| Spermidine | 20 d                            | 352.1         | 0 to 100         | 0 to 27.5                            | No data                           | 29.04                            | No data                          | No data                          |
| Spermine   | 20 d                            | 41.4          | 100 to 200       | 5.7 to 11.4                          | No data                           | 0 to 29.04                       | No data                          | No data                          |
| Putrescine | 40 d                            | 390.5         | 100 to 200       | 33.4 to 66.97                        | No data                           |                                  | 0 to 502.45                      | No data                          |
| Spermidine | 40 d                            | 281.2         | 100              | 0 to 27.55                           | No data                           |                                  | 0 to 206.15                      | No data                          |
| Spermine   | 40 d                            | 15.5          | 300 to 400       | No detected                          | No data                           |                                  | 0 to 47.5                        | No data                          |
| Putrescine | 50 d                            | 544.0         | 300 to 400       | No data                              | 50.16 to 191.61                   |                                  | 0 to 502.4                       | 275.5                            |
| Spermidine | 50 d                            | 195.9         | 0 to 100         | No data                              | 13.78 to 34.48                    |                                  | 0 to 206.2                       | 57                               |
| Spermine   | 50 d                            | 16.9          | 100 to 200       | No data                              | 1.9 to 3.8                        |                                  | 0 to 19.2                        | 9.5                              |

Original data units: <sup>a</sup>nmol/g FW. <sup>b</sup>nmol/g. <sup>c</sup>µmol/g FW. <sup>d</sup>nmol/g FW. <sup>e</sup>mg/100g FW

**Table S4.** Mean values ( $\mu\text{g/g DW}$ ) of Polyamines in Tomato at Different Maturity Stages

| Cultivar       | Maturity stage   | <i>Tpa</i> | <i>Put</i>     | <i>Spd</i> | <i>Spm</i> |
|----------------|------------------|------------|----------------|------------|------------|
| <b>Huichol</b> | <b>Green</b>     | 1930q      | 84lmn          | 101lm      | 11ghij     |
|                | <b>Break</b>     | 222pq      | 130jklmn       | 87lm       | 7ghij      |
|                | <b>Turning</b>   | 270opq     | 170hijklmn     | 93lm       | 9ghij      |
|                | <b>Pink</b>      | 214pq      | 146jklmn       | 64m        | 5ij        |
|                | <b>Light red</b> | 351mnopq   | 280defghijklm  | 66m        | 4ij        |
|                | <b>Red</b>       | 193pq      | 155ijklmn      | 32m        | 5hij       |
| <b>RG</b>      | <b>Green</b>     | 207pq      | 66mn           | 125klm     | 16fghij    |
|                | <b>Break</b>     | 187pq      | 60mn           | 114lm      | 17fghij    |
|                | <b>Turning</b>   | 143q       | 53mn           | 96lm       | -          |
|                | <b>Pink</b>      | 147q       | 61mn           | 85lm       | -          |
|                | <b>Light red</b> | 181pq      | 84lmn          | 98lm       | -          |
|                | <b>Red</b>       | 242pq      | 134jklmn       | 102lm      | 26defgh    |
| <b>HT23</b>    | <b>Green</b>     | 949defghij | 339defghijk    | 551bc      | 59abc      |
|                | <b>Break</b>     | 797fghijk  | 258defghijklmn | 479bcde    | 59abc      |
|                | <b>Turning</b>   | 808fghijk  | 335defghijk    | 449bcdefg  | 23efghij   |
|                | <b>Pink</b>      | 767fghijk  | 399defghi      | 342efghi   | 16fghij    |
|                | <b>Light red</b> | 762fghiljk | 403defghi      | 343efghi   | 16fghij    |
|                | <b>Red</b>       | 798fghijk  | 507d           | 270hijk    | 21fghij    |
| <b>HT37</b>    | <b>Green</b>     | 1044cdefg  | 433defg        | 568b       | 42cde      |
|                | <b>Break</b>     | 947defghij | 464defg        | 441bcdefg  | 41cde      |
|                | <b>Turning</b>   | 767fghjki  | 485def         | 269hijk    | 13ghij     |
|                | <b>Pink</b>      | 1511b      | 1040b          | 447bcdefg  | 23efgi     |
|                | <b>Light red</b> | 874hijkl   | 423defg        | 239ijkl    | 18gfghij   |
|                | <b>Red</b>       | 1204bcde   | 784c           | 396defghi  | 24defghi   |
| <b>Lia</b>     | <b>Green</b>     | 983defghi  | 348defghijk    | 565b       | 69ab       |

|               |                  |            |                |            |         |
|---------------|------------------|------------|----------------|------------|---------|
|               | <b>Break</b>     | 607jklmno  | 234fghijklm    | 329efghi   | 44cd    |
|               | <b>Turning</b>   | 536klmnop  | 232ghijklmn    | 291ghij    | 14ghij  |
|               | <b>Pink</b>      | 683ghijklm | 284defghijklm  | 381efghi   | 18fghij |
|               | <b>Light red</b> | 898frghijk | 409defgh       | 399cdefghi | 13ghij  |
|               | <b>Red</b>       | 733fghijkl | 409defgh       | 303fghij   | 20fghij |
|               |                  |            |                |            |         |
| <b>Shanty</b> | <b>Green</b>     | 774fghijk  | 286defghijklm  | 412cdefgh  | 76a     |
|               | <b>Break</b>     | 932defghij | 421defg        | 457bcdef   | 53abc   |
|               | <b>Turning</b>   | 618ijklmn  | 301defghijklm  | 290ghij    | 27defg  |
|               | <b>Pink</b>      | 196pq      | 107klmn        | 81m        | 8ghij   |
|               | <b>Light red</b> | 173q       | 102klmn        | 69m        | 4j      |
|               | <b>Red</b>       | 322nopq    | 259defghijklmn | 59m        | 4j      |
| <b>HT25</b>   | <b>Green</b>     | 1370bc     | 498de          | 796a       | 77a     |
|               | <b>Break</b>     | 1015defgh  | 399defghi      | 542bcd     | 74a     |
|               | <b>Turning</b>   | 626hijklmn | 429defg        | 172jklm    | 26defg  |
|               | <b>Pink</b>      | 867efghijk | 371defghij     | 472bcde    | 8ghij   |
|               | <b>Light red</b> | 652hijklmn | 320defghijkl   | 307fghij   | 4ij     |
|               | <b>Red</b>       | 388lmnopq  | 249efghijklm   | 125klm     | 4ij     |
| <b>HT36</b>   | <b>Green</b>     | 44q        | 23n            | 20m        | 2j      |
|               | <b>Break</b>     | 889efghijk | 487de          | 367efghi   | 35def   |
|               | <b>Turning</b>   | 1168cde    | 776c           | 371efghi   | 21fghij |
|               | <b>Pink</b>      | 1091cdef   | 715c           | 365efghi   | 16fghij |
|               | <b>Light red</b> | 1260bcd    | 860bc          | 376efghi   | 23efghi |
|               | <b>Red</b>       | 2155a      | 1855a          | 280hij     | 20fghij |

Numbers in a column followed by the same letters are not significantly different a  $P < 0.05$  with the Tukey post-hoc test

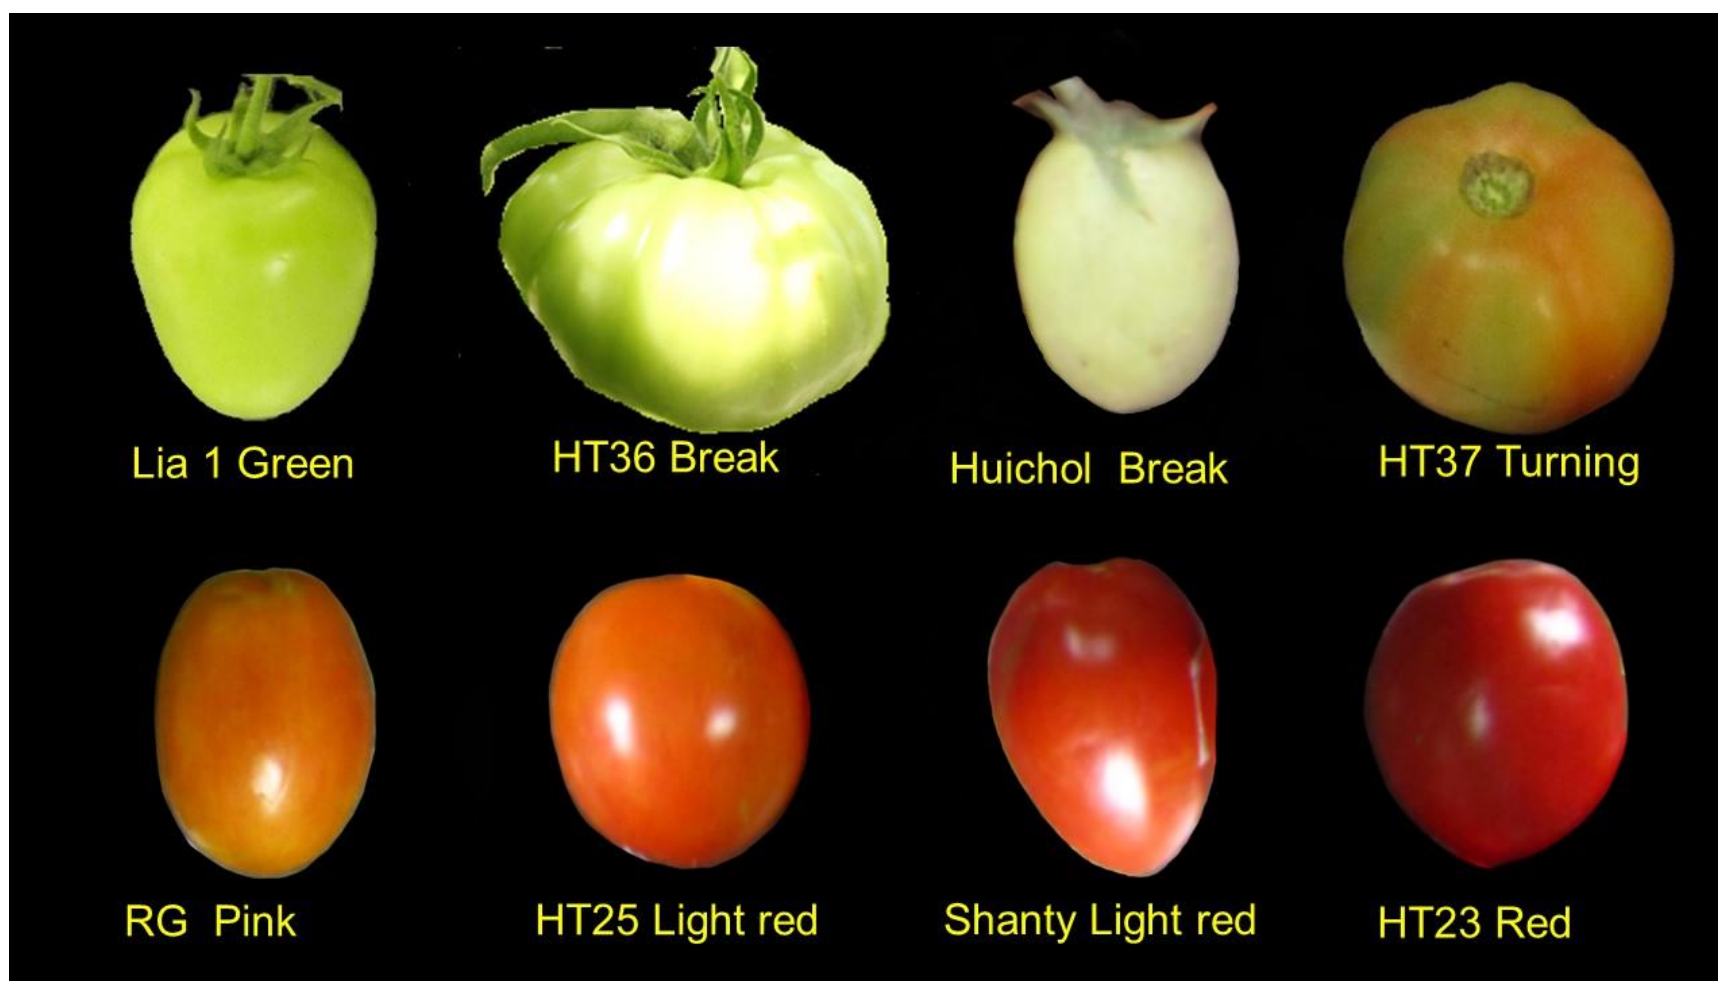

**Figure S1.** Representative samples showing the different maturation stages of tomatoes from various genotypes ('Huichol', 'Rio Grande' (RG), 'HT23', 'HT37', 'Lia', 'Shanty', 'HT25' and 'HT36').

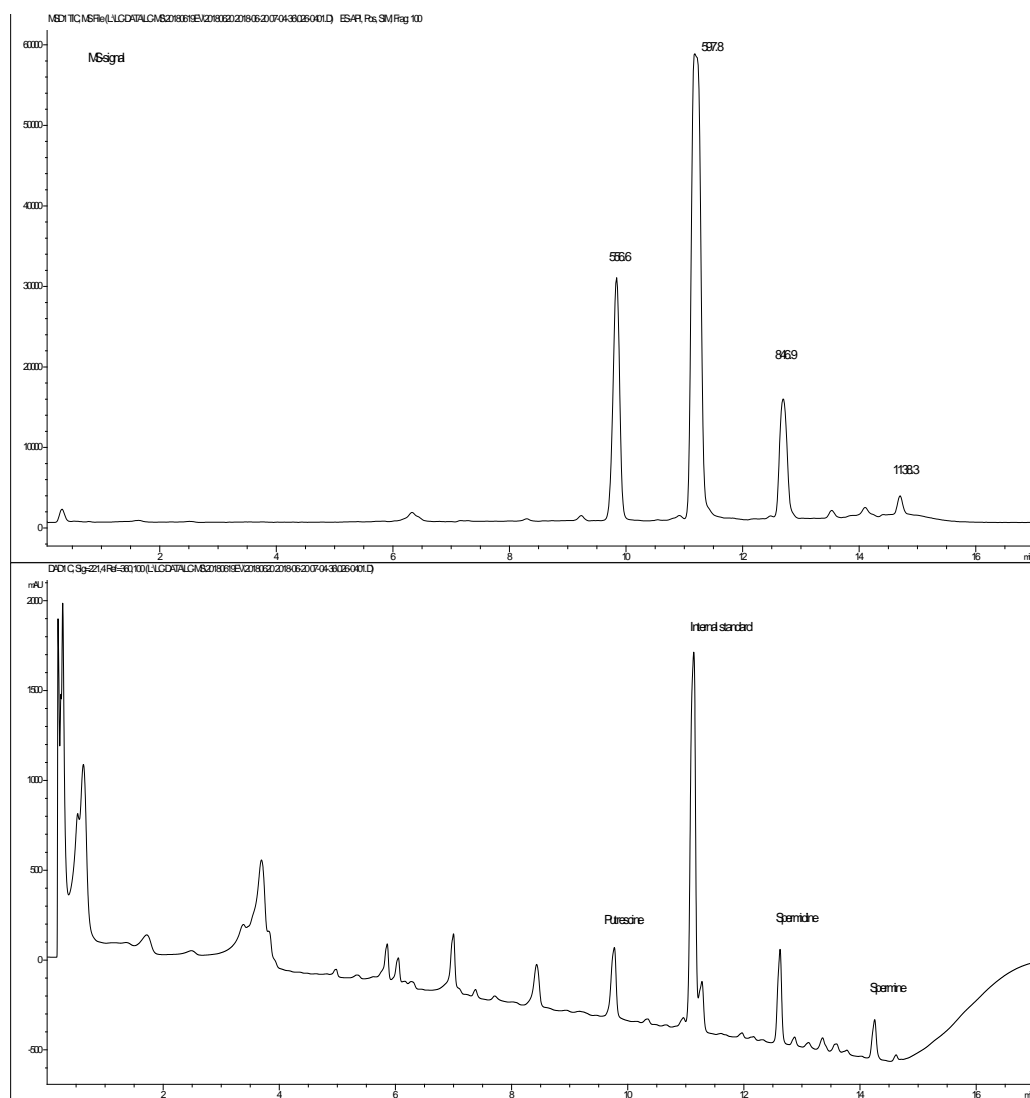

**Figure S2.** Polyamines chromatogram. A: MS-signal of Putrescine (Put), 1,7-diaminoheptane as an Internal standard (IS), Spermidine (Spd) and Spermine (Spm) standards. B: DAD-LC-MS signal at 221 nm ± 4 nm of a representative sample. Retention time: Put at 9.867; IS at 11.245, Spd at 12.730 and Spm at 14.753.

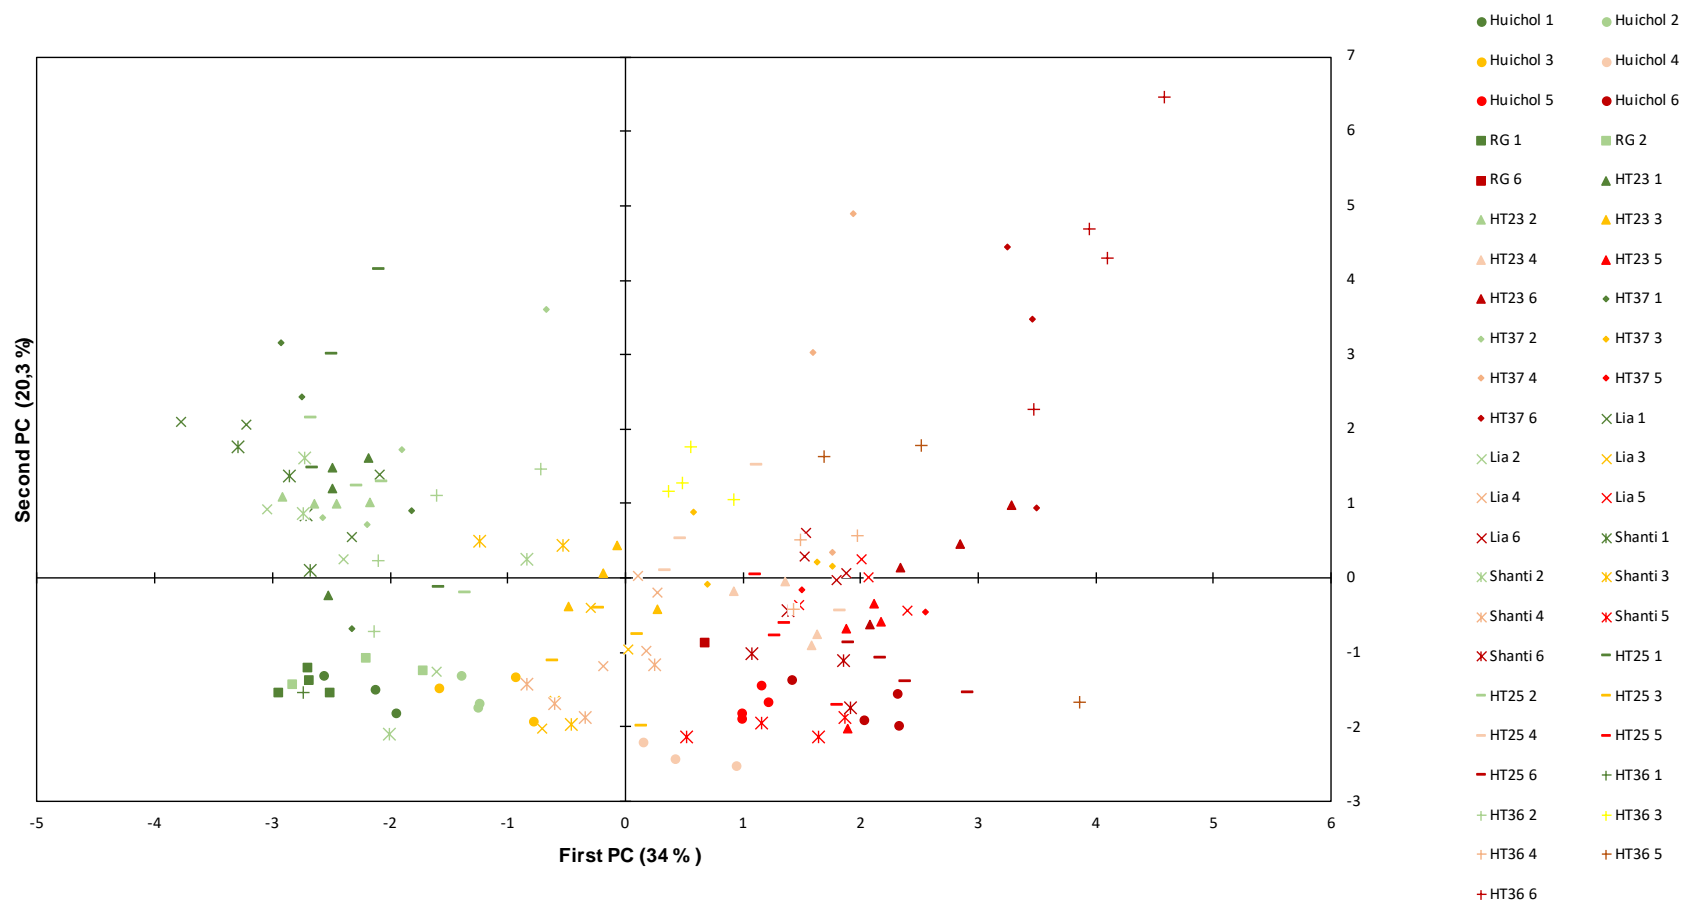

**Figure S3.** Loading plot generated from PCA on values of each tomato evaluated, from quality traits (Chroma (brightness),  $a^*$  value (redness),  $b^*$  value (blueness),  $L^*$  value (lightness), TSS (total soluble sugar), Ta (titratable acidity), TSS/Ta (total soluble sugar and titratable acidity ratio), Aa (ascorbic acid), Firmness, pH and Weight) and polyamines contents (Tpa (Total content of polyamines), Put (putrescine), Spd (spermidine), Spm (spermine) of eight genotypes 'Huichol= ●', 'Rio Grande (RG)= ■', 'HT23= ▲', 'HT37= ◆', 'Lia= ×', 'Shanty= ✱', 'HT25= - ', and 'HT36= + ' at six maturity stages (marked with different colours; green= green tomatoes, light green= break, yellow= turning, pink= pink, light red=light red, red=red).
